# Supplementary material for: Combined electrochemical and microscopic study of porous enzymatic electrodes with direct electron transfer mechanism
Source: Royal Society of Chemistry journal article supplement (doi:10.1039/c4ra07495e), 2014-01-01
Supplement: c4ra07495e1.pdf [file c4ra07495e1.pdf]

## Supplementary Information

### Combined Electrochemical and Microscopic Study of Porous Enzymatic Electrodes with Direct Electron Transfer Mechanism

M. Varničić,<sup>a</sup> K. Bettenbrock,<sup>a</sup> D. Hermsdorf,<sup>a</sup> T. Vidaković-Koch,<sup>a,\*</sup> and K. Sundmacher<sup>a,b</sup>

<sup>a</sup> Max Planck Institute for Dynamics of Complex Technical Systems, Sandtorstraße 1, 39106 Magdeburg

<sup>b</sup> Otto-von-Guericke University Magdeburg, Universitätsplatz 2, 39106 Magdeburg

*\*corresponding author, E-mail: vidakovic@mpi-magdeburg.mpg.de*

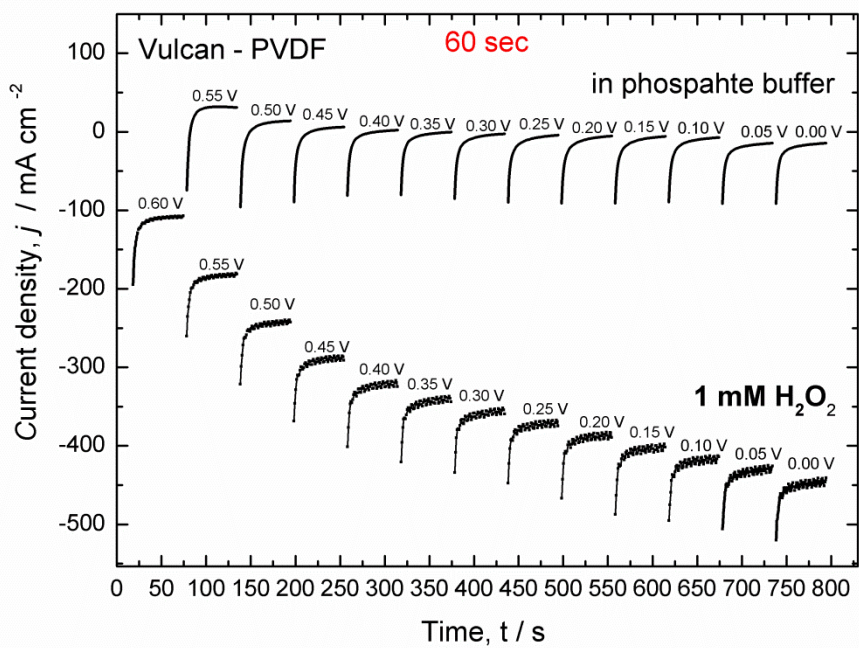

a)

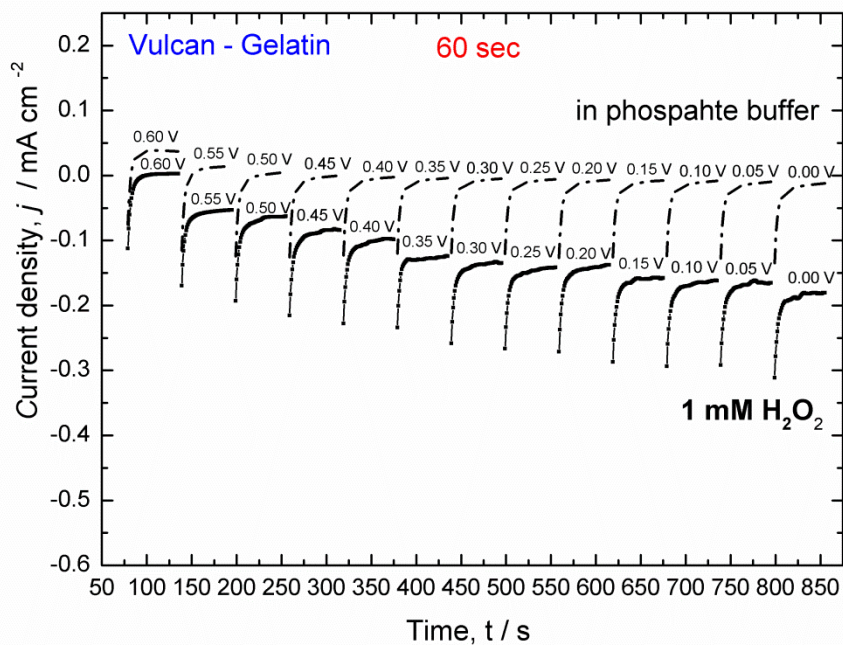

b)

**Fig. S1** Chronoamperometric responses of a) Vulcan –PVDF and b) Vulcan-Gelatin electrodes, Conditions: pH 6, 400 rpm

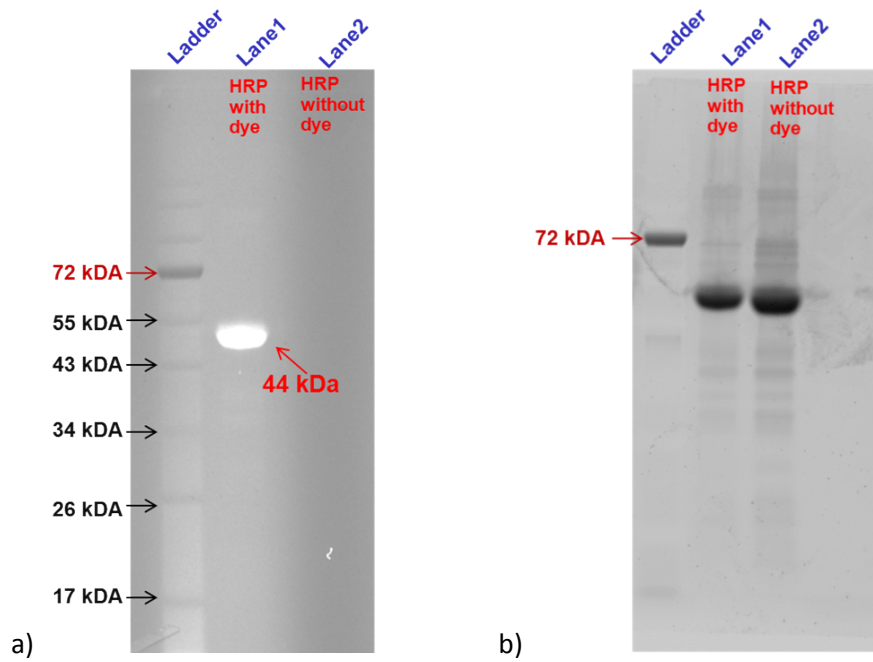

**Fig. S2** Electrophoresis measurements: a) gel observed under UV lamp after separation before standard staining procedure and b) gel with all separated proteins after staining procedure

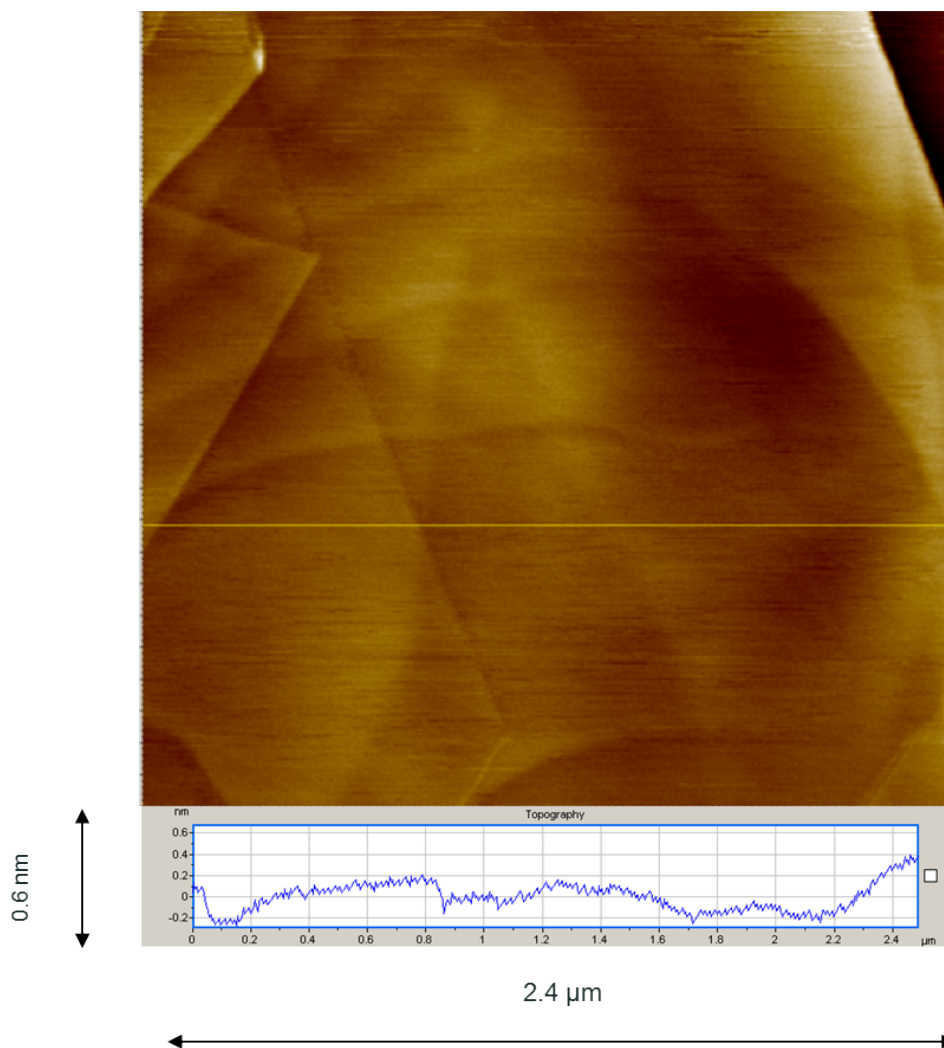

**Fig. S3** AFM image of HOPG surface before modification with HRP

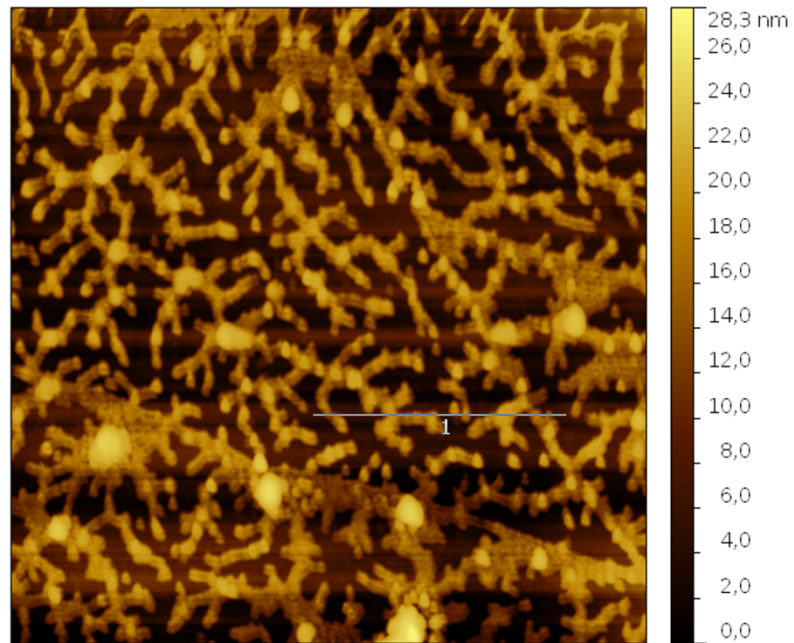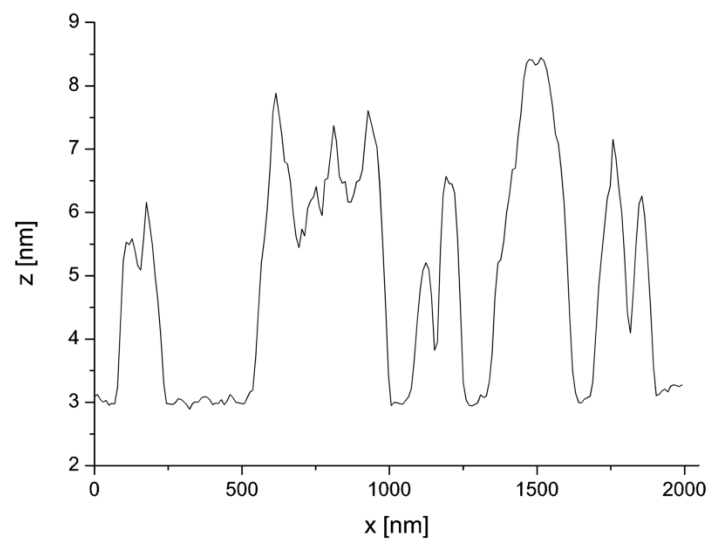

**Fig. S4** AFM image of HRP adsorbed on HOPG in a monolayer at pH 7.2
